# Supplementary material
Source: PubMed Central journal article supplement (PMC6931394)
Supplement: NIHMS1062887-supplement-Supplemental_Table.pdf [file NIHMS1062887-supplement-Supplemental_Table.pdf]

**Appendix Table A2. Criteria for Comorbidities**

| Condition                 | Encounter, Billing, or Problem List |                    | Medication GPI (2-digit) | Lab/Biometric/Other                                                             | Description (Meet ≥1 Criterion)                                                                                                                                                                                                                                                                                                                                                                                                                                         | Exclusions                                                                                                                                                  |
|---------------------------|-------------------------------------|--------------------|--------------------------|---------------------------------------------------------------------------------|-------------------------------------------------------------------------------------------------------------------------------------------------------------------------------------------------------------------------------------------------------------------------------------------------------------------------------------------------------------------------------------------------------------------------------------------------------------------------|-------------------------------------------------------------------------------------------------------------------------------------------------------------|
|                           | ICD-9                               | ICD-10             |                          |                                                                                 |                                                                                                                                                                                                                                                                                                                                                                                                                                                                         |                                                                                                                                                             |
| <b>Metabolic Syndrome</b> | 277.7                               | E88.81             | N/A                      | See criteria below †                                                            | See criteria below †                                                                                                                                                                                                                                                                                                                                                                                                                                                    |                                                                                                                                                             |
| <b>Prediabetes</b>        | 790.29                              | R73.09<br>V77.1-TS | 27                       | FBG: 100 to <126mg/dL<br><br>HbA1c: 5.7% to <6.5%<br><br>OGTT: 140 to <200mg/dL | <ol style="list-style-type: none"> <li>≥2 abnormal labs 90-365 days apart;</li> <li>≥1 abnormal lab <b>AND</b> ≥1 medication order;</li> <li>1 problem list, encounter, or billing diagnosis <b>AND</b> ≥1 abnormal lab</li> </ol>                                                                                                                                                                                                                                      | Meet criteria for type 2 diabetes (below) or has evidence of type 1 diabetes, defined as a problem list, encounter, or billing diagnosis of 250.x1 or E10.x |
| <b>Type 2 Diabetes</b>    | 250.x                               | E11.x              | 27                       | FBG: ≥126mg/dL<br><br>HbA1c: ≥6.5%<br><br>OGTT: ≥200mg/dL                       | <ol style="list-style-type: none"> <li>1 problem list diagnosis <b>AND</b> ≥1 encounter or billing diagnoses;</li> <li>≥2 encounter or billing diagnoses ≥90 days apart;</li> <li>≥2 abnormal labs 90-365 days apart;</li> <li>≥1 abnormal lab <b>AND</b> ≥1 medication order;</li> <li>1 problem list, encounter, or, billing diagnosis <b>AND</b> ≥1 medication order;</li> <li>1 problem list, encounter, or billing diagnosis <b>AND</b> ≥1 abnormal lab</li> </ol> | Evidence of type 1 diabetes, defined as a problem list, encounter, or billing diagnosis of 250.x1 or E10.x                                                  |
| <b>Hypertension</b>       | 401.x; 796.2                        | I10                | 37, 36, 34, 33           | SBP: ≥140 (≥130 for T2D)<br><br>DBP: ≥ 90 (≥80 for T2D)                         | <ol style="list-style-type: none"> <li>1 problem list diagnosis <b>AND</b> ≥1 encounter or billing diagnoses;</li> <li>≥2 encounter or billing diagnoses ≥90 days apart;</li> <li>≥2 confirmatory SBP or DB ≥90-365 days apart;</li> <li>≥1 problem list, encounter, or billing diagnosis <b>AND</b> ≥1 medication order;</li> </ol>                                                                                                                                    |                                                                                                                                                             |

|                     |                                   |                       |    |                                                                   |                                                                                                                                                                                                                                                                                                                                                                                                             |  |
|---------------------|-----------------------------------|-----------------------|----|-------------------------------------------------------------------|-------------------------------------------------------------------------------------------------------------------------------------------------------------------------------------------------------------------------------------------------------------------------------------------------------------------------------------------------------------------------------------------------------------|--|
|                     |                                   |                       |    |                                                                   | 5. ≥1 problem list, encounter, or billing diagnosis <b>AND</b> ≥1 abnormal SBP or DBP                                                                                                                                                                                                                                                                                                                       |  |
| <b>Dyslipidemia</b> | 272.x                             | E78.x                 | 39 | TC: ≥200mg/dL<br>LDL: ≥160mg/dL<br>HDL: <40mg/dL<br>TG: ≥200mg/dL | 1. 1 problem list diagnosis <b>AND</b> ≥1 encounter or billing diagnoses ;<br>2. ≥2 encounter, or billing diagnoses ≥90 days apart<br>3. ≥2 abnormal labs 90-365 days apart;<br>4. ≥1 abnormal lab <b>AND</b> ≥1 medication order;<br>5. ≥ 1 problem list, encounter, or billing diagnosis <b>AND</b> ≥1 medication order;<br>6. 1 problem list, encounter, or billing diagnosis <b>AND</b> ≥1 abnormal lab |  |
| <b>Depression</b>   | 311;<br>296.2x<br>296.3x<br>300.4 | F32.x<br>F33.x; F34.1 | 58 | --                                                                | 1. 1 problem list diagnosis <b>AND</b> ≥1 encounter or billing diagnosis<br>2. ≥2 encounter or billing diagnoses;<br>3. ≥1 problem list, encounter, or billing diagnosis <b>AND</b> ≥1 medication order                                                                                                                                                                                                     |  |

DBP, diastolic blood pressure; FBG, fasting blood glucose; GPI, generic product identifier; HbA1c, hemoglobin A1c; ICD, International Classification of Disease; OGTT, oral glucose tolerance test; SBP, systolic blood pressure.

†Patients must have at least 3 of the following:

1. Body Mass Index ≥30 kg/m<sup>2</sup> in non-Asian patients or ≥27 kg/m<sup>2</sup> in Asian patients
2. Identified as having hypertension (described above)
3. Identified as having prediabetes or diabetes (described above)
4. Triglycerides ≥150 mg/dL (at least 2 values at least 90-365 days apart), or at least 1 value and evidence of a triglyceride lowering medication (fibrates [GPI=3920]; niacin [GPI=3945]; omega-3 fatty acids [GPI=3950])
5. Low HDL <40 mg/dL in men or <50 mg/dL in women (at least 2 values at least 90-365 days apart), or at least 1 value and evidence of an HDL raising medication (fibrates [GPI=3920], niacin [GPI=3945])
